# Supplementary material for: Toxicity Screening of a Gambierdiscus australes Strain from the Western Mediterranean Sea and Identification of a Novel Maitotoxin Analogue
Source: MDPI journal article supplement (doi:10.3390/md19080460), 2021-08-15
Supplement: s1 [file s1]

# **Supplementary materials : Toxicity screening of a *Gambierdiscus australes* strain from the western Mediterranean Sea and identification of a novel Maitotoxin analogue**

**Pablo Estevez, David Castro, José Manuel Leão-Martins, Manoëlla Sibat, Angels Tudó, Robert Dickey, Jorge Diogene, Philipp Hess, Ana Gago-Martinez**

**Table S1.** List of the 11 molecular formula (M, as unsalted molecule). Unsaturations generated by ChemCalc for MTX5. Mass differences ( $\Delta$  ppm) between the accurate monoisotopic  $m/z$  of MTX5 spectra and the theoretical  $m/z$ . Ranking was based on the average of the absolute values of  $\Delta$  ppm ( $|\Delta \text{ ppm}|$ ). M excluded from further studies because they presented an average  $|\Delta \text{ ppm}| > 3$  (grey). Proposed M for MTX5 (black).

| Ranking | Molecular formula (M)                                            | Unsaturations | $ \Delta \text{ ppm} $<br>Average | $\Delta \text{ ppm}$ |                  |                   |                     |                    |                  |                   |
|---------|------------------------------------------------------------------|---------------|-----------------------------------|----------------------|------------------|-------------------|---------------------|--------------------|------------------|-------------------|
|         |                                                                  |               |                                   | $[M-2H]^{2-}$        | $[M+Na-3H]^{2-}$ | $[M+2Na-4H]^{2-}$ | $[M-2H+4NH_4]^{2+}$ | $[M-H+3NH_4]^{2+}$ | $[M+2NH_4]^{2+}$ | $[M+H+NH_4]^{2+}$ |
| #01     | C <sub>157</sub> H <sub>252</sub> O <sub>73</sub> S              | 32            | 0,7                               | -2,3                 | 0,2              | -0,4              | 0,2                 | 0,3                | 0,2              | 1,3               |
| #02     | C <sub>161</sub> H <sub>252</sub> O <sub>68</sub> S <sub>2</sub> | 36            | 1,1                               | -1,6                 | 1,0              | 0,3               | 0,9                 | 1,1                | 1,0              | 2,0               |
| #03     | C <sub>164</sub> H <sub>248</sub> O <sub>68</sub> S              | 41            | 1,8                               | -0,6                 | 2,0              | 1,3               | 1,9                 | 2,1                | 2,0              | 3,0               |
| #04     | C <sub>168</sub> H <sub>248</sub> O <sub>63</sub> S <sub>2</sub> | 45            | 2,4                               | 0,2                  | 2,7              | 2,0               | 2,6                 | 2,8                | 2,7              | 3,8               |
| #05     | C <sub>168</sub> H <sub>248</sub> O <sub>65</sub> S              | 45            | 2,7                               | -5,2                 | -2,6             | -3,2              | -2,6                | -2,5               | -1,7             | -1,5              |
| #06     | C <sub>165</sub> H <sub>252</sub> O <sub>65</sub> S <sub>2</sub> | 40            | 3,9                               | -6,2                 | -3,6             | -4,2              | -3,6                | -3,5               | -3,6             | -2,6              |
| #07     | C <sub>161</sub> H <sub>252</sub> O <sub>70</sub> S              | 36            | 4,6                               | -6,9                 | -4,3             | -5,0              | -4,3                | -4,2               | -4,3             | -3,3              |
| #08     | C <sub>157</sub> H <sub>252</sub> O <sub>71</sub> S <sub>2</sub> | 32            | 5,2                               | 3,0                  | 5,5              | 4,8               | 5,3                 | 5,5                | 5,5              | 6,6               |
| #09     | C <sub>158</sub> H <sub>256</sub> O <sub>70</sub> S <sub>2</sub> | 31            | 5,6                               | -7,9                 | -5,4             | -6,0              | -5,3                | -5,2               | -5,3             | -4,3              |
| #10     | C <sub>160</sub> H <sub>248</sub> O <sub>71</sub> S              | 37            | 6,2                               | 4,0                  | 6,5              | 5,8               | 6,3                 | 6,5                | 6,5              | 7,5               |
| #11     | C <sub>164</sub> H <sub>248</sub> O <sub>66</sub> S <sub>2</sub> | 41            | 6,9                               | 4,7                  | 7,2              | 6,6               | 7,1                 | 7,3                | 7,2              | 8,3               |

**Table S2.** Isotopic ratio profiles obtained from experimental data of MTX5 and from theoretical data of the selected molecular formulae (#01, #02, #03, #04, and #05, Table S1). Most intense ions species of the positive and negative HRMS spectra of MTX5. RA: Relative abundance.

| Ion species                            | MTX5              |       | #(01) C <sub>157</sub> H <sub>252</sub> O <sub>73</sub> S |      |        | #(02) C <sub>161</sub> H <sub>252</sub> O <sub>68</sub> S <sub>2</sub> |      |        | #(03) C <sub>164</sub> H <sub>248</sub> O <sub>68</sub> S |      |        | #(04) C <sub>168</sub> H <sub>248</sub> O <sub>63</sub> S <sub>2</sub> |      |        | #(05) C <sub>168</sub> H <sub>248</sub> O <sub>65</sub> S |      |        |
|----------------------------------------|-------------------|-------|-----------------------------------------------------------|------|--------|------------------------------------------------------------------------|------|--------|-----------------------------------------------------------|------|--------|------------------------------------------------------------------------|------|--------|-----------------------------------------------------------|------|--------|
|                                        | Experimental data |       |                                                           |      |        |                                                                        |      |        |                                                           |      |        |                                                                        |      |        |                                                           |      |        |
|                                        | <i>m/z</i>        | RA(%) | Theoretical <i>m/z</i>                                    | Δppm | RA (%) | Theoretical <i>m/z</i>                                                 | Δppm | RA (%) | Theoretical <i>m/z</i>                                    | Δppm | RA (%) | Theoretical <i>m/z</i>                                                 | Δppm | RA (%) | Theoretical <i>m/z</i>                                    | Δppm | RA (%) |
| [M-2H] <sup>2-</sup>                   | 1.667,7752        | 45,5  | 1667,7791                                                 | -2,3 | 56,7   | 1667,7778                                                              | -1,6 | 53,7   | 1667,7762                                                 | -0,6 | 53,8   | 1667,7749                                                              | 0,2  | 50,4   | 1667,7838                                                 | -5,2 | 51,8   |
|                                        | 1.668,2779        | 94,5  | 1668,2808                                                 | -1,7 | 100,0  | 1668,2795                                                              | -1,0 | 97,4   | 1668,2779                                                 | 0,0  | 98,7   | 1668,2766                                                              | 0,8  | 94,9   | 1668,2855                                                 | -4,6 | 97,2   |
|                                        | 1.668,7794        | 100,0 | 1668,7822                                                 | -1,7 | 98,7   | 1668,7809                                                              | -0,9 | 100,0  | 1668,7793                                                 | 0,1  | 100,0  | 1668,7780                                                              | 0,8  | 100,0  | 1668,7870                                                 | -4,6 | 100,0  |
|                                        | 1.669,2809        | 71,9  | 1669,2836                                                 | -1,6 | 70,3   | 1669,2820                                                              | -0,7 | 74,6   | 1669,2807                                                 | 0,1  | 72,7   | 1669,2792                                                              | 1,0  | 76,0   | 1669,2883                                                 | -4,4 | 73,5   |
|                                        | 1.669,7813        | 39,9  | 1669,7848                                                 | -2,1 | 40,1   | 1669,7831                                                              | -1,1 | 44,6   | 1669,7820                                                 | -0,4 | 42,0   | 1669,7803                                                              | 0,6  | 46,1   | 1669,7896                                                 | -5,0 | 42,9   |
|                                        | 1.670,2813        | 18,2  | 1670,2861                                                 | -2,9 | 19,2   | 1670,2842                                                              | -1,7 | 22,5   | 1670,2832                                                 | -1,1 | 20,4   | 1670,2813                                                              | 0,0  | 23,6   | 1670,2909                                                 | -5,7 | 21,0   |
|                                        | 1.670,7817        | 7,9   | 1670,7873                                                 | -3,4 | 8,1    | 1670,7852                                                              | -2,1 | 9,9    | 1670,7844                                                 | -1,6 | 8,6    | 1670,7824                                                              | -0,4 | 10,5   | 1670,7921                                                 | -6,2 | 8,9    |
|                                        | 1.671,2828        | 3,0   | 1671,2885                                                 | -3,4 | 3,0    | 1671,2862                                                              | -2,0 | 3,9    | 1671,2856                                                 | -1,7 | 3,2    | 1671,2834                                                              | -0,4 | 4,1    | 1671,2933                                                 | -6,3 | 3,4    |
| [M-2H+4NH <sub>4</sub> ] <sup>2+</sup> | 1.703,8470        | 43,2  | 1703,8467                                                 | 0,2  | 56,2   | 1703,8455                                                              | 0,9  | 52,9   | 1703,8438                                                 | 1,9  | 52,9   | 1703,8426                                                              | 2,6  | 49,6   | 1703,8514                                                 | -2,6 | 51,0   |
|                                        | 1.704,3516        | 93,3  | 1704,3484                                                 | 1,9  | 100,0  | 1704,3472                                                              | 2,6  | 96,7   | 1704,3455                                                 | 3,6  | 98,0   | 1704,3442                                                              | 4,3  | 94,3   | 1704,3531                                                 | -0,9 | 96,5   |
|                                        | 1.704,8523        | 100,0 | 1704,8499                                                 | 1,4  | 99,4   | 1704,8485                                                              | 2,2  | 100,0  | 1704,8469                                                 | 3,2  | 100,0  | 1704,8456                                                              | 3,9  | 100,0  | 1704,8546                                                 | -1,3 | 100,0  |
|                                        | 1.705,3536        | 72,6  | 1705,3512                                                 | 1,4  | 71,3   | 1705,3497                                                              | 2,3  | 75,1   | 1705,3483                                                 | 3,1  | 73,2   | 1705,3468                                                              | 4,0  | 76,5   | 1705,3559                                                 | -1,3 | 74,0   |
|                                        | 1.705,8539        | 41,5  | 1705,8524                                                 | 0,9  | 40,8   | 1705,8507                                                              | 1,9  | 45,1   | 1705,8496                                                 | 2,5  | 42,5   | 1705,8479                                                              | 3,5  | 46,7   | 1705,8572                                                 | -1,9 | 43,4   |
|                                        | 1.706,3481        | 26,2  | 1706,3536                                                 | -3,2 | 19,7   | 1706,3518                                                              | -2,2 | 22,9   | 1706,3508                                                 | -1,6 | 20,8   | 1706,3489                                                              | -0,5 | 24,0   | 1706,3585                                                 | -6,1 | 21,3   |
| [M-H+3NH <sub>4</sub> ] <sup>2+</sup>  | 1.695,3340        | 53,7  | 1695,3335                                                 | 0,3  | 56,3   | 1695,3322                                                              | 1,1  | 53,1   | 1695,3305                                                 | 2,1  | 53,1   | 1695,3293                                                              | 2,8  | 49,8   | 1695,3382                                                 | -2,5 | 51,1   |
|                                        | 1.695,8385        | 100,0 | 1695,8352                                                 | 1,9  | 100,0  | 1695,8339                                                              | 2,7  | 96,9   | 1695,8322                                                 | 3,7  | 98,2   | 1695,8310                                                              | 4,4  | 94,4   | 1695,8398                                                 | -0,8 | 96,7   |
|                                        | 1.696,3385        | 99,6  | 1696,3366                                                 | 1,1  | 99,2   | 1696,3352                                                              | 1,9  | 100,0  | 1696,3337                                                 | 2,8  | 100,0  | 1696,3323                                                              | 3,7  | 100,0  | 1696,3413                                                 | -1,7 | 100,0  |
|                                        | 1.696,8394        | 80,0  | 1696,8379                                                 | 0,9  | 71,0   | 1696,8364                                                              | 1,8  | 75,0   | 1696,8350                                                 | 2,6  | 73,0   | 1696,8335                                                              | 3,5  | 76,4   | 1696,8427                                                 | -1,9 | 73,9   |
|                                        | 1.697,3401        | 46,3  | 1697,3392                                                 | 0,5  | 40,6   | 1697,3375                                                              | 1,5  | 45,0   | 1697,3363                                                 | 2,2  | 42,4   | 1697,3346                                                              | 3,2  | 46,5   | 1697,3440                                                 | -2,3 | 43,3   |
|                                        | 1.697,8313        | 31,9  | 1697,8404                                                 | -5,4 | 19,6   | 1697,8385                                                              | -4,2 | 22,8   | 1697,8375                                                 | -3,7 | 20,7   | 1697,8357                                                              | -2,6 | 23,9   | 1697,8452                                                 | -8,2 | 21,2   |
| [M+2NH <sub>4</sub> ] <sup>2+</sup>    | 1686,8206         | 51,7  | 1686,8202                                                 | 0,2  | 56,5   | 1686,8189                                                              | 1,0  | 53,3   | 1686,8173                                                 | 2,0  | 53,3   | 1686,8160                                                              | 2,7  | 50,0   | 1686,8249                                                 | -2,5 | 51,3   |
|                                        | 1687,3229         | 94,7  | 1687,3219                                                 | 0,6  | 100,0  | 1687,3206                                                              | 1,4  | 97,0   | 1687,3189                                                 | 2,4  | 98,3   | 1687,3177                                                              | 3,1  | 94,6   | 1687,3266                                                 | -2,2 | 96,9   |
|                                        | 1687,8262         | 100,0 | 1687,8233                                                 | 1,7  | 99,0   | 1687,8220                                                              | 2,5  | 100,0  | 1687,8204                                                 | 3,4  | 100,0  | 1687,8190                                                              | 4,3  | 100,0  | 1687,8280                                                 | -1,1 | 100,0  |
|                                        | 1668,3265         | 68,8  | 1668,3247                                                 | 1,1  | 70,8   | 1668,3231                                                              | 2,0  | 74,9   | 1668,3218                                                 | 2,8  | 72,9   | 1668,3202                                                              | 3,8  | 76,3   | 1668,3294                                                 | -1,7 | 73,7   |
|                                        | 1688,8272         | 42,0  | 1688,8259                                                 | 0,8  | 40,5   | 1688,8242                                                              | 1,8  | 44,9   | 1688,8230                                                 | 2,5  | 42,3   | 1688,8214                                                              | 3,4  | 46,4   | 1688,8307                                                 | -2,1 | 43,1   |
|                                        | 1689,3247         | 25,8  | 1689,3271                                                 | -1,4 | 19,5   | 1689,3253                                                              | -0,4 | 22,7   | 1689,3243                                                 | 0,2  | 20,6   | 1689,3224                                                              | 1,4  | 23,8   | 1689,3319                                                 | -4,3 | 21,1   |

**Table S3.** MRM ion transitions of the different CTXs monitored by LC-MS/MS.

| Toxin                         | Precursor ion<br>[M+Na] <sup>+</sup> ( <i>m/z</i> ) | Product ion<br>[M+Na] <sup>+</sup> ( <i>m/z</i> ) | Fragmentor (V) | CE (eV) | CAV (eV) |
|-------------------------------|-----------------------------------------------------|---------------------------------------------------|----------------|---------|----------|
| CTX1B                         | 1133.6                                              | 1133.6                                            | 380            | 40      | 4        |
| C-CTX1                        | 1163.7                                              | 1163.7                                            | 380            | 40      | 4        |
| 2,3-dihydroxyCTX3C            | 1079.6                                              | 1079.6                                            | 380            | 40      | 4        |
| 51-hydroxyCTX3C               | 1061.6                                              | 1061.6                                            | 380            | 40      | 4        |
| 52- <i>epi</i> -54-deoxyCTX1B | 1117.6                                              | 1117.6                                            | 380            | 40      | 4        |
| 54-deoxyCTX1B                 | 1117.6                                              | 1117.6                                            | 380            | 40      | 4        |
| 49- <i>epi</i> -CTX3C         | 1045.6                                              | 1045.6                                            | 380            | 40      | 4        |
| CTX3C                         | 1045.6                                              | 1045.6                                            | 380            | 40      | 4        |
| CTX4A                         | 1083.6                                              | 1083.6                                            | 380            | 40      | 4        |
| CTX4B                         | 1083.6                                              | 1083.6                                            | 380            | 40      | 4        |

**Table S4.** MRM ion transitions monitored by LC-MS/MS of the different toxic metabolites produced by dinoflagellates as well as accumulated in fish tissue. FP1, FP2 and FP3: Fingerprint ion No.1, No.2 and No.3

| Compound             | Retention time (min) | ESI | MRM Transitions Q1/Q3 (m/z)                                                |               | CE (eV) | CAV (eV) |
|----------------------|----------------------|-----|----------------------------------------------------------------------------|---------------|---------|----------|
| gambierone           | 8.00                 | -   | [M-H] <sup>-</sup> / [M-H] <sup>-</sup>                                    | 1023.5/1023.5 | 30      | 5        |
|                      |                      |     | [M-H] <sup>-</sup> / [HOSO <sub>3</sub> ] <sup>-</sup>                     | 1023.5/96.9   | 60      | 5        |
|                      |                      | +   | [M+H] <sup>+</sup> /FP1                                                    | 1025.5/803.4  | 33      | 5        |
|                      |                      |     | [M+H] <sup>+</sup> /FP2                                                    | 1025.5/219.1  | 25      | 5        |
|                      |                      |     | [M+H] <sup>+</sup> /FP3                                                    | 1025.5/109.1  | 49      | 5        |
| MTX4                 | 8.49                 | -   | [M-2H] <sup>2-</sup> / [M-2H] <sup>2-</sup>                                | 1646.2/1646.2 | 30      | 5        |
|                      |                      |     | [M-2H] <sup>2-</sup> /[HOSO <sub>3</sub> ] <sup>-</sup>                    | 1646.2/96.9   | 60      | 5        |
| CTX1B                | 8.64                 | +   | [M+NH <sub>4</sub> ] <sup>+</sup> /[M+H-H <sub>2</sub> O] <sup>+</sup>     | 1128.6/1093.6 | 19      | 5        |
|                      |                      |     | [M+NH <sub>4</sub> ] <sup>+</sup> /FP1                                     | 1128.6/171.2  | 43      | 5        |
|                      |                      |     | [M+NH <sub>4</sub> ] <sup>+</sup> /FP2                                     | 1128.6/95.2   | 55      | 5        |
| 44-methyl gambierone | 8.76                 | -   | [M-H] <sup>-</sup> / [M-H] <sup>-</sup>                                    | 1037.5/1037.5 | 30      | 5        |
|                      |                      |     | [M-H] <sup>-</sup> / [HOSO <sub>3</sub> ] <sup>-</sup>                     | 1037.5/96.9   | 60      | 5        |
|                      |                      | +   | [M+H] <sup>+</sup> /FP1                                                    | 1039.5/803.4  | 33      | 5        |
|                      |                      |     | [M+H] <sup>+</sup> /FP2                                                    | 1039.5/233.1  | 25      | 5        |
|                      |                      |     | [M+H] <sup>+</sup> /FP3                                                    | 1039.5/109.1  | 49      | 5        |
| MTX5                 | 8.87                 | -   | [M-2H] <sup>2-</sup> / [M-2H] <sup>2-</sup>                                | 1668.8/1668.8 | 30      | 5        |
|                      |                      |     | [M-2H] <sup>2-</sup> /[HOSO <sub>3</sub> ] <sup>-</sup>                    | 1668.8/96.9   | 60      | 5        |
| C-CTX1               | 9.65                 | +   | [M+H-H <sub>2</sub> O] <sup>+</sup> / [M+H-2H <sub>2</sub> O] <sup>+</sup> | 1023.6/1105.6 | 25      | 5        |
|                      |                      |     | [M+H-H <sub>2</sub> O] <sup>+</sup> / [M+H-3H <sub>2</sub> O] <sup>+</sup> | 1023.6/1087.6 | 29      | 5        |
|                      |                      |     | [M+H-H <sub>2</sub> O] <sup>+</sup> / [M+H-4H <sub>2</sub> O] <sup>+</sup> | 1023.6/1069.6 | 37      | 5        |
|                      |                      |     | [M+H-H <sub>2</sub> O] <sup>+</sup> / FP1                                  | 1023.6/191.1  | 41      | 5        |
|                      |                      |     | [M+H-H <sub>2</sub> O] <sup>+</sup> / FP2                                  | 1023.6/108.9  | 52      | 5        |
| gambieric acid C     | 11.28                | -   | [M-H] <sup>-</sup> /[M-H] <sup>-</sup>                                     | 1183.7/1183.7 | 30      | 5        |
|                      |                      |     | [M+H] <sup>+</sup> /FP1                                                    | 1185.7/1039.6 | 17      | 5        |
|                      |                      | +   | [M+H] <sup>+</sup> /FP2                                                    | 1185.7/943.5  | 21      | 5        |
|                      |                      |     | [M+H] <sup>+</sup> /FP3                                                    | 1185.7/135.1  | 49      | 5        |
| gambieric acid D     | 11.34                | -   | [M-H] <sup>-</sup> /[M-H] <sup>-</sup>                                     | 1197.7/1197.7 | 30      | 5        |
|                      |                      |     | [M+H] <sup>+</sup> /FP1                                                    | 1199.7/1053.6 | 17      | 5        |
|                      |                      | +   | [M+H] <sup>+</sup> /FP2                                                    | 1199.7/957.6  | 21      | 5        |
|                      |                      |     | [M+H] <sup>+</sup> /FP3                                                    | 1199.7/135.1  | 49      | 5        |

|                                    |             |   |                                                                            |               |    |   |
|------------------------------------|-------------|---|----------------------------------------------------------------------------|---------------|----|---|
| C-CTX1-Me                          | 11.40       | + | [M+H-H <sub>2</sub> O] <sup>+</sup> / [M+H-2H <sub>2</sub> O] <sup>+</sup> | 1023.6/1105.6 | 25 | 5 |
|                                    |             |   | [M+H-H <sub>2</sub> O] <sup>+</sup> / [M+H-3H <sub>2</sub> O] <sup>+</sup> | 1023.6/1087.6 | 29 | 5 |
|                                    |             |   | [M+H-H <sub>2</sub> O] <sup>+</sup> / [M+H-4H <sub>2</sub> O] <sup>+</sup> | 1023.6/1069.6 | 37 | 5 |
|                                    |             |   | [M+H-H <sub>2</sub> O] <sup>+</sup> / FP1                                  | 1023.6/191.1  | 41 | 5 |
|                                    |             |   | [M+H-H <sub>2</sub> O] <sup>+</sup> / FP2                                  | 1023.6/108.9  | 52 | 5 |
| 51-hydroxyCTX3C                    | 12.15       | + | [M+H] <sup>+</sup> / [M+H-H <sub>2</sub> O] <sup>+</sup>                   | 1039.6/1021.6 | 15 | 5 |
|                                    |             |   | [M+H] <sup>+</sup> /FP1                                                    | 1039.6/155.1  | 31 | 5 |
|                                    |             |   | [M+H] <sup>+</sup> /FP2                                                    | 1039.6/125.1  | 39 | 5 |
| 52-epi-54-deoxyCTX1B/54-deoxyCTX1B | 12.21/12.59 | + | [M+NH <sub>4</sub> ] <sup>+</sup> / [M+H-H <sub>2</sub> O] <sup>+</sup>    | 1112.6/1094.6 | 15 | 5 |
|                                    |             |   | [M+NH <sub>4</sub> ] <sup>+</sup> /FP1                                     | 1112.6/155.1  | 39 | 5 |
|                                    |             |   | [M+NH <sub>4</sub> ] <sup>+</sup> /FP2                                     | 1112.6/125.1  | 35 | 5 |
| CTX3C                              | 17.20       | + | [M+H] <sup>+</sup> / [M+H-H <sub>2</sub> O] <sup>+</sup>                   | 1023.6/1005.6 | 15 | 5 |
|                                    |             |   | [M+H] <sup>+</sup> /FP1                                                    | 1023.6/155.1  | 27 | 5 |
|                                    |             |   | [M+H] <sup>+</sup> /FP2                                                    | 1023.6/125.1  | 35 | 5 |
| CTX4A/CTX4B                        | 17.26/17.70 | + | [M+H] <sup>+</sup> / [M+H-H <sub>2</sub> O] <sup>+</sup>                   | 1061.6/1043.6 | 15 | 5 |
|                                    |             |   | [M+H] <sup>+</sup> /FP1                                                    | 1061.6/155.1  | 31 | 5 |
|                                    |             |   | [M+H] <sup>+</sup> /FP2                                                    | 1061.6/125.1  | 39 | 5 |
